# Supplementary material for: A systematic review of implementation frameworks of innovations in healthcare and resulting generic implementation framework
Source: Springer Nature journal article supplement (doi:10.1186/s12961-015-0005-z), 2015-03-13
Supplement: MOESM2 [file 9765904]

**Additional File 2: Framework analysis**

| Innovation category | Framework                                                                |                                   | Orientation                                                                        |                                                                                       |                                                                  |                                                                                                                | Type                                     | Stages      |               |             |              |           | Domains        |            | Elements    |              |                   |                 |          |            |             |
|---------------------|--------------------------------------------------------------------------|-----------------------------------|------------------------------------------------------------------------------------|---------------------------------------------------------------------------------------|------------------------------------------------------------------|----------------------------------------------------------------------------------------------------------------|------------------------------------------|-------------|---------------|-------------|--------------|-----------|----------------|------------|-------------|--------------|-------------------|-----------------|----------|------------|-------------|
|                     | Title                                                                    | Reference                         | Innovation                                                                         | Setting                                                                               | User(s)                                                          | Aim                                                                                                            | Descriptive<br>Explanatory<br>Predictive | Development | Communication | Exploration | Installation | Operation | Sustainability | Innovation | Individuals | Organisation | Local environment | External system | Factors  | Strategies | Evaluations |
| Interventions       | Conceptual framework for sustainability of public health programs        | Scheirer MA & Dearing JW. 2011[1] | Funded programs of healthcare, health promotion & disease prevention interventions | Health organisations and community settings                                           | Researchers and funders                                          | Provide guidance, for research and evaluation, of health program sustainability                                | Predictive                               |             |               |             |              |           | ✓              | ✓          | ✓           | ✓            | ✓                 | ++<br>^^        | +<br>^   | +++<br>^^  |             |
| Interventions       | Sustainability planning model                                            | Johnson K et al. 2004[2]          | Substance abuse prevention innovations, programs and strategies                    | Organisational, community, state or national level substance abuse prevention systems | Researchers and practitioners                                    | Highlight the key factors relating to sustaining innovations and how to address them                           | Prescriptive Explanatory                 |             |               |             |              |           | ✓              | ✓          | ✓           |              |                   | ++<br>^^^       | ++<br>^^ | ++<br>^^   |             |
| Interventions       | Capacity for sustainability framework                                    | Schell SF et al. 2013[3]          | Public health programs (prevention)                                                | Community practice settings                                                           | Researchers, funders and practitioners                           | Aid public health programs in conceptualizing their capacity for sustainability                                | Descriptive                              |             |               |             |              |           | ✓              | ✓          | ✓           | ✓            | ✓                 | ++<br>^         | +<br>^   | +<br>^     |             |
| Interventions       | Interactive Systems Framework for dissemination and implementation (ISF) | Wandersman A et al. 2008[4]       | Prevention innovations (programs, policies, processes & principles)                | Organisational, community, state or national level                                    | Multiple stakeholders (e.g. funders, practitioners, researchers) | Heuristic to help clarify the issues related to how to move what is known about prevention into widespread use | Descriptive Explanatory                  |             | ✓             | ✓           | ✓            | ✓         |                |            | ✓           | ✓            | ✓                 | ✓               | +<br>^   | ++<br>^^   | nil         |

| Innovation category | Framework                                                           |                                | Orientation                                                                  |                               |                                          |                                                                                                                                 | Type                                     | Stages      |               |             |              |           |                | Domains    |             | Elements     |                   |                 |           |            |             |
|---------------------|---------------------------------------------------------------------|--------------------------------|------------------------------------------------------------------------------|-------------------------------|------------------------------------------|---------------------------------------------------------------------------------------------------------------------------------|------------------------------------------|-------------|---------------|-------------|--------------|-----------|----------------|------------|-------------|--------------|-------------------|-----------------|-----------|------------|-------------|
|                     | Title                                                               | Reference                      | Innovation                                                                   | Setting                       | User(s)                                  | Aim                                                                                                                             | Descriptive<br>Explanatory<br>Predictive | Development | Communication | Exploration | Installation | Operation | Sustainability | Innovation | Individuals | Organisation | Local environment | External system | Factors   | Strategies | Evaluations |
| Interventions       | TCU Program Change Model                                            | Simpson DD & Flynn PM. 2007[5] | Community drug treatment programs and health service innovations             | Community-based organisations | Researchers                              | Organize and summarize implementation results                                                                                   | Descriptive Explanatory                  |             |               | ✓           | ✓            | ✓         | ✓              | ✓          | ✓           | ✓            | ✓                 |                 | ++<br>^^^ | ++<br>^^   | ++<br>^^^   |
| Interventions       | Ecological framework for understanding effective implementation     | Durlak JA & DuPre EP. 2008[6]  | Promotion and prevention programs/ interventions                             | Community settings            | Researchers                              | Framework to depict the factors that affect implementation                                                                      | Explanatory Predictive                   |             | ✓             | ✓           | ✓            | ✓         | ✓              | ✓          | ✓           | ✓            | ✓                 |                 | +++<br>^^ | ++<br>^^   | ++<br>^^    |
| Interventions       | Core implementation components                                      | Fixsen DL et al. 2009[7]       | Research-based prevention and treatment services, interventions and programs | Human service settings        | Researchers and practitioners            | Present the critical links of implementation stages and core components in the science to service chain                         | Descriptive                              |             |               | ✓           | ✓            | ✓         | ✓              |            | ✓           | ✓            | ✓                 |                 | ++<br>^   | +++<br>^^  | +<br>^      |
| Interventions       | Model of sustaining innovations in their effectiveness              | Racine DP. 2006[8]             | Health and human service innovations                                         | Human and health services     | Creators, funders, adopters, researchers | Describe factors that appear to play important roles in whether innovations are replicated and sustained in their effectiveness | Explanatory Predictive                   |             |               | ✓           |              | ✓         | ✓              | ✓          |             | ✓            | ✓                 | ✓               | ++<br>^^^ | ++<br>^^   | nil         |
| Interventions       | Framework of dissemination in health services intervention research | Mendel P et al. 2008[9]        | Evidence-based health interventions (mental health)                          | Community healthcare settings | Health services researchers              | Evaluation and capacity focus (stakeholder/ community partnerships)                                                             | Descriptive Explanatory                  |             |               |             | ✓            | ✓         | ✓              |            | ✓           | ✓            | ✓                 | ✓               | +<br>^^^  | +<br>^     | ++<br>^^^   |

| Innovation category | Framework                                                                                                |                                                                                      | Orientation                                                                      |                                                                     |                                                                                               |                                                                                                                         | Type                                     | Stages      |               |             |              |           |                | Domains    |             | Elements     |                   |                 |           |            |             |
|---------------------|----------------------------------------------------------------------------------------------------------|--------------------------------------------------------------------------------------|----------------------------------------------------------------------------------|---------------------------------------------------------------------|-----------------------------------------------------------------------------------------------|-------------------------------------------------------------------------------------------------------------------------|------------------------------------------|-------------|---------------|-------------|--------------|-----------|----------------|------------|-------------|--------------|-------------------|-----------------|-----------|------------|-------------|
|                     | Title                                                                                                    | Reference                                                                            | Innovation                                                                       | Setting                                                             | User(s)                                                                                       | Aim                                                                                                                     | Descriptive<br>Explanatory<br>Predictive | Development | Communication | Exploration | Installation | Operation | Sustainability | Innovation | Individuals | Organisation | Local environment | External system | Factors   | Strategies | Evaluations |
| Interventions       | Conceptual model of implementation phases and factors affecting implementation in public service sectors | Aarons GA, Hurlburt M and McCue Horwitz S. 2011[10]                                  | Evidence-based practices (mental health services and human service technologies) | Public sector systems serving children and families (child welfare) | Multiple stakeholders                                                                         | Framework which includes the importance of variables at each implementation phase                                       | Descriptive Explanatory                  |             |               | ✓           | ✓            | ✓         | ✓              | ✓          | ✓           | ✓            | ✓                 | ✓               | ++<br>^^^ | +<br>^     | nil         |
| Interventions       | Integrated 2-phase TCU approach to strategic system change                                               | Lehman WEK et al. 2011[11]                                                           | Evidence-based practices (technologies)                                          | Substance abuse treatment services                                  | Researchers and organisations                                                                 | Present a biphasic framework for innovation planning and implementation                                                 | Explanatory                              | ✓           |               | ✓           | ✓            | ✓         | ✓              | ✓          | ✓           | ✓            |                   |                 | ++<br>^^  | ++<br>^^   | +++<br>^^^  |
| Interventions       | ATTC Network model of technology transfer in the innovation process                                      | Addiction Technology Transfer Center Network Technology Transfer Workgroup. 2011[12] | Evidence based practices (technologies)                                          | Substance abuse treatment organisations                             | Stakeholders (funders, organisations educational institutions, practitioners) and researchers | Field-driven conceptual model of innovation process and to provide a comprehensive taxonomy                             | Descriptive                              | ✓           | ✓             | ✓           |              | ✓         |                | ✓          | ✓           | ✓            |                   |                 | +<br>^    | +<br>^     | nil         |
| Interventions       | Practical, Robust Implementation and Sustainability Model (PRISM)                                        | Feldstein AC & Glasgow RE. 2008[13]                                                  | Health interventions (programs, technologies, evidence-based practices)          | Healthcare practices                                                | Researchers and healthcare managers                                                           | Integrate key features of program design, predictors of implementation and diffusion, and appropriate outcomes measures | Descriptive Explanatory                  |             |               |             | ✓            | ✓         | ✓              | ✓          | ✓           | ✓            | ✓                 |                 | ++<br>^^^ | ++<br>^^^  | ++<br>^     |

| Innovation category | Framework                                                                              |                                | Orientation                                                    |                                                                  |                                         |                                                                                                             | Type                                     | Stages      |               |             |              |           |                | Domains    |             |              | Elements          |                 |            |            |             |     |
|---------------------|----------------------------------------------------------------------------------------|--------------------------------|----------------------------------------------------------------|------------------------------------------------------------------|-----------------------------------------|-------------------------------------------------------------------------------------------------------------|------------------------------------------|-------------|---------------|-------------|--------------|-----------|----------------|------------|-------------|--------------|-------------------|-----------------|------------|------------|-------------|-----|
|                     | Title                                                                                  | Reference                      | Innovation                                                     | Setting                                                          | User(s)                                 | Aim                                                                                                         | Descriptive<br>Explanatory<br>Predictive | Development | Communication | Exploration | Installation | Operation | Sustainability | Innovation | Individuals | Organisation | Local environment | External system | Factors    | Strategies | Evaluations |     |
| Interventions       | Consolidated Framework of Implementation Research (CFIR)                               | Damschorder LJ et al. 2009[14] | Health interventions                                           | Multiple contexts                                                | Health services researchers             | Consolidate all factors that may be encountered, promote theory development and guide formative evaluations | Descriptive                              |             | ✓             |             | ✓            | ✓         |                | ✓          | ✓           | ✓            | ✓                 | ✓               | +++<br>^^^ | +          | +           | +   |
| Interventions       | A model of diffusion in service organizations                                          | Greenhalgh T et al. 2004[15]   | Health service innovations                                     | Healthcare service organisations                                 | Researchers                             | Depict how to spread and sustain innovations in health service delivery and organisation                    | Descriptive Explanatory                  | ✓           | ✓             | ✓           |              | ✓         | ✓              | ✓          | ✓           | ✓            | ✓                 | ✓               | +++<br>^^  | ++         | ^^          | nil |
| Interventions       | Factors that determine the rate of adopting of innovations from research into practice | Bradley EH et al. 2004[16]     | Clinical programs and innovations                              | Multiple settings. Hospital, nursing home, paediatrics, pharmacy | Researchers                             | Describe the factors and steps learned about diffusing innovations into practice                            | Descriptive Explanatory                  |             |               |             |              | ✓         | ✓              | ✓          |             | ✓            |                   | ✓               | ++<br>^^   | ++         | ^^          | +   |
| Interventions       | Conceptual framework of complex innovation implementation                              | Helfrich CD et al. 2007[17]    | Complex innovations                                            | Healthcare organisations                                         | Researchers, managers and practitioners | Adapt an organisational framework of innovation implementation for utility in healthcare                    | Predictive                               |             |               |             |              | ✓         |                |            |             | ✓            |                   |                 | ++<br>^^^  | +          | ^^^         | +   |
| Interventions       | Normalisation Process Theory (NPT)                                                     | May C & Finch T. 2009[18]      | Complex practices: Business processes or complex interventions | Organisations or institutions                                    | Researchers                             | Propose a working model of implementation, embedding and integration                                        | Descriptive Explanatory Predictive       |             |               |             | ✓            | ✓         | ✓              | ✓          | ✓           | ✓            | ✓                 |                 | ++<br>^^   | ++         | ^^          | ++  |

| Innovation category | Framework                                                    |                                                | Orientation                                                                  |                          |                               |                                                                                                                     | Type                               | Stages      |               |             |              |           |                | Domains    |             |              | Elements          |                 |          |            |             |
|---------------------|--------------------------------------------------------------|------------------------------------------------|------------------------------------------------------------------------------|--------------------------|-------------------------------|---------------------------------------------------------------------------------------------------------------------|------------------------------------|-------------|---------------|-------------|--------------|-----------|----------------|------------|-------------|--------------|-------------------|-----------------|----------|------------|-------------|
|                     | Title                                                        | Reference                                      | Innovation                                                                   | Setting                  | User(s)                       | Aim                                                                                                                 | Descriptive Explanatory Predictive | Development | Communication | Exploration | Installation | Operation | Sustainability | Innovation | Individuals | Organisation | Local environment | External system | Factors  | Strategies | Evaluations |
| Interventions       | Normalisation Process Theory (NPT)                           | May C. 2013[19]                                | Innovations: Shared decision making in doctor and nurse-patient interactions | Healthcare organisations | Researchers                   | Specify specific set of activities involved in implementation (process) and embedding (state) of innovations        | Descriptive Explanatory Predictive |             |               |             | ✓            | ✓         | ✓              |            |             |              |                   |                 | nil      | ++<br>^^   | ++<br>^     |
| Interventions       | General theory of implementation                             | May C. 2013[20]                                | Complex interventions                                                        | Clinical settings        | Researchers and practitioners | Foundation for understanding, designing, predicting, and evaluating dynamic implementation processes                | Descriptive Explanatory Predictive |             |               |             |              | ✓         |                | ✓          | ✓           | ✓            | ✓                 | ✓               | ++<br>^^ | +<br>^^^   | nil         |
| Interventions       | Model for success and breakdown factors of shared governance | Ballard N. 2010[21]                            | Shared governance                                                            | Practice settings        | Nursing leaders               | Summarise human and structural factors that contribute to success or breakdown of shared governance practice models | Descriptive                        |             |               | ✓           | ✓            | ✓         |                | ✓          | ✓           | ✓            |                   |                 | +<br>^   | ++<br>^^   | nil         |
| Interventions       | Model and checklist for telehealth                           | Joseph V et al. 2011[22]                       | Telehealth                                                                   | Healthcare organisations | Practitioners                 | Identify the key challenges for telehealth projects (trials) & produce a model and checklist to ensure success      | Descriptive                        |             |               | ✓           | ✓            | ✓         |                | ✓          | ✓           | ✓            |                   |                 | ++<br>^^ | ++<br>^^   | +<br>^      |
| Guidelines          | Three phase implementation model                             | Carey M, Buchnan H & Sanson-Fisher R. 2009[23] | Evidence-based guideline recommendations                                     | Healthcare               | Guideline developers          | Provide strategies targeting factors associated with behavioural change in a logical sequence                       | Descriptive                        | ✓           | ✓             | ✓           | ✓            |           | ✓              | ✓          | ✓           | ✓            |                   |                 | +<br>^   | ++<br>^^^  | +<br>^      |

| Innovation category | Framework                                                                               |                                                 | Orientation                                             |                               |                               |                                                                                                                                          | Type                                     | Stages      |               |             |              |           |                | Domains    |             |              | Elements          |                 |           |            |             |
|---------------------|-----------------------------------------------------------------------------------------|-------------------------------------------------|---------------------------------------------------------|-------------------------------|-------------------------------|------------------------------------------------------------------------------------------------------------------------------------------|------------------------------------------|-------------|---------------|-------------|--------------|-----------|----------------|------------|-------------|--------------|-------------------|-----------------|-----------|------------|-------------|
|                     | Title                                                                                   | Reference                                       | Innovation                                              | Setting                       | User(s)                       | Aim                                                                                                                                      | Descriptive<br>Explanatory<br>Predictive | Development | Communication | Exploration | Installation | Operation | Sustainability | Innovation | Individuals | Organisation | Local environment | External system | Factors   | Strategies | Evaluations |
| Guidelines          | Contingency model of innovation adoption                                                | Berta W et al. 2005[24]                         | Clinical practice guidelines to improve quality of care | Long-term care facilities     | Researchers                   | Describe factors that contribute to capacity building at each stage of innovation adoption                                               | Predictive                               |             | ✓             |             |              | ✓         | ✓              | ✓          | ✓           | ✓            | ✓                 | ✓               | ++<br>^^  | +<br>^     | nil         |
| Guidelines          | Model matrix of factors in implementation of practice change                            | Hader JM et al. 2007[25]                        | Clinical practice guidelines                            | Doctors in clinical practice  | Guideline developers          | Insights into the determinants of change which may help identify means to increase successful implementation                             | Descriptive                              |             | ✓             | ✓           |              | ✓         | ✓              | ✓          | ✓           |              | ✓                 |                 | ++<br>^^  | +<br>^     | nil         |
| Guidelines          | Guideline implementability framework                                                    | Gagliardi AR et al. 2011[26]                    | Guidelines                                              | Healthcare                    | Guideline developers          | Identify and define features that facilitate guideline use                                                                               | Descriptive                              |             |               |             |              | ✓         |                | ✓          |             |              |                   |                 | +<br>^    | +<br>^     | +<br>^      |
| Knowledge           | 10-step model for inducing change in professional behaviour                             | Grol R & Wensing M. 2004[27]                    | Evidence (Change in practice)                           | Health services               | Researchers                   | How to identify, categorize and use barriers and incentives to change practice, to tailor interventions and to facilitate desired change | Prescriptive                             |             | ✓             | ✓           |              | ✓         | ✓              | ✓          | ✓           | ✓            | ✓                 | ✓               | ++<br>^^  | ++<br>^    | nil         |
| Knowledge           | John Hopkins Quality and Safety Research Group translating evidence into practice model | Pronovost P, Berenholtz S & Needham D. 2008[28] | Evidence (evidence-based therapies & interventions)     | Hospitals - clinical practice | Researchers and clinicians    | Embed a method of knowledge translation in a collaborative team model                                                                    | Prescriptive                             | ✓           |               |             | ✓            | ✓         | ✓              |            |             |              |                   |                 | +<br>^    | +<br>^^    | +<br>^^     |
| Knowledge           | Promoting Action on Research Implementation in Health Services (PARIHS)                 | Kitson AL et al. 2008[29]                       | Evidence                                                | Hospital                      | Researchers and practitioners | Heuristic to frame research or knowledge translation endeavours as two stage diagnostic and evaluative approach                          | Explanatory                              |             |               |             | ✓            | ✓         |                | ✓          | ✓           | ✓            |                   |                 | ++<br>^^^ | ++<br>^^^  | ++<br>^^    |

| Innovation category | Framework                                                                 |                                            | Orientation                           |                                                               |                                                                  |                                                                                                                             | Type                                     | Stages      |               |             |              |           |                | Domains    |             | Elements     |                   |                 |           |            |             |
|---------------------|---------------------------------------------------------------------------|--------------------------------------------|---------------------------------------|---------------------------------------------------------------|------------------------------------------------------------------|-----------------------------------------------------------------------------------------------------------------------------|------------------------------------------|-------------|---------------|-------------|--------------|-----------|----------------|------------|-------------|--------------|-------------------|-----------------|-----------|------------|-------------|
|                     | Title                                                                     | Reference                                  | Innovation                            | Setting                                                       | User(s)                                                          | Aim                                                                                                                         | Descriptive<br>Explanatory<br>Predictive | Development | Communication | Exploration | Installation | Operation | Sustainability | Innovation | Individuals | Organisation | Local environment | External system | Factors   | Strategies | Evaluations |
| Knowledge           | Revised PARIHS framework for a task-orientated approach to implementation | Stetler CB et al. 2011[30]                 | Evidence based practices              | Veterans Health Administration healthcare settings or similar | Researchers                                                      | Revising PARIHS framework for use in task-orientated implementation                                                         | Explanatory                              |             |               |             | ✓            | ✓         |                | ✓          | ✓           | ✓            |                   |                 | ++<br>^^^ | +++<br>^^^ | +++<br>^^^  |
| Knowledge           | Promoting Action on Research Implementation in Health Services (PARIHS)   | Rycroft-Malone J et al. 2013[31]           | Evidence                              | Hospital                                                      | Researchers and practitioners                                    | Represent the process of implementation of evidence to practice                                                             | Explanatory                              |             |               |             | ✓            | ✓         |                | ✓          | ✓           | ✓            |                   |                 | ++<br>^^  | ++<br>^^^  | ++<br>^     |
| Knowledge           | Critical Realism & the Arts Research Utilization Model (CRARUM)           | Kontos PC & Poland BD. 2009[32]            | Knowledge                             | Healthcare settings                                           | Researchers                                                      | Incorporate the interpretive dimension of evidence and complexity of healthcare settings into a Knowledge Translation model | Descriptive<br>Explanatory               |             |               | ✓           | ✓            | ✓         | ✓              | ✓          | ✓           | ✓            | ✓                 |                 | ++<br>^^  | ++<br>^^^  | ++<br>^^    |
| Knowledge           | Analytic framework: moving knowledge into action                          | Best A, Hiatt RA & Norman CD. 2008[33]     | Cancer control strategies (knowledge) | Cancer control systems                                        | Practitioners                                                    | Integrate knowledge into the system (decisions, practices and policies) with communication as a central role                | Descriptive                              |             | ✓             | ✓           |              | ✓         |                | ✓          | ✓           | ✓            | ✓                 | ✓               | +<br>^    | ++<br>^^   | nil         |
| Knowledge           | Knowledge to Action (KTA)                                                 | Graham ID et al. 2006[34]                  | Knowledge (research)                  | Healthcare practice                                           | Healthcare practitioners, policymakers, patients, and the public | Conceptual map of the Knowledge-To-Action process                                                                           | Prescriptive                             | ✓           | ✓             | ✓           | ✓            | ✓         | ✓              | ✓          | ✓           | ✓            |                   |                 | +<br>^    | +<br>^     | ++<br>^^^   |
| Knowledge           | Sticky knowledge                                                          | Elwyn G, Taubert M & Kowalczuk J. 2007[35] | Knowledge (evidence)                  | Primary care                                                  | Clinicians and management                                        | Demonstrate sticky knowledge may play a role in helping overcome barriers to transfer                                       | Descriptive                              |             |               | ✓           | ✓            | ✓         | ✓              | ✓          | ✓           | ✓            |                   |                 | ++<br>^^  | +<br>^     | nil         |

| Innovation category | Framework                                                         |                                                | Orientation                        |                                        |                                                         |                                                                                                                    | Type                                     | Stages      |               |             |              |           |                | Domains    |             |              | Elements          |                 |          |            |             |
|---------------------|-------------------------------------------------------------------|------------------------------------------------|------------------------------------|----------------------------------------|---------------------------------------------------------|--------------------------------------------------------------------------------------------------------------------|------------------------------------------|-------------|---------------|-------------|--------------|-----------|----------------|------------|-------------|--------------|-------------------|-----------------|----------|------------|-------------|
|                     | Title                                                             | Reference                                      | Innovation                         | Setting                                | User(s)                                                 | Aim                                                                                                                | Descriptive<br>Explanatory<br>Predictive | Development | Communication | Exploration | Installation | Operation | Sustainability | Innovation | Individuals | Organisation | Local environment | External system | Factors  | Strategies | Evaluations |
| Knowledge           | Joint Venture Model of Knowledge Utilization (JVMKU)              | Edgar L et al. 2006[36]                        | Knowledge                          | Nursing and healthcare                 | Nurses                                                  | Practical guide for critical reflection on issues affecting the process of knowledge utilisation                   | Descriptive Explanatory                  |             | ✓             |             |              | ✓         |                | ✓          | ✓           | ✓            | ✓                 | ✓               | ++<br>^  | ++<br>^    | +<br>^      |
| Knowledge           | Knowledge-value chain                                             | Landry R et al. 2006[37]                       | Knowledge (research)               | Public Health organisations (e.g. WHO) |                                                         | Use of knowledge management for the capability to acquire, create, share and apply knowledge                       | Descriptive                              | ✓           | ✓             |             |              | ✓         |                | ✓          |             | ✓            |                   |                 | +<br>^   | +<br>^     | +<br>^      |
| Knowledge           | Multisystem model of knowledge integration and translation        | Palmer D & Kramlich D. 2011[38]                | Knowledge                          | Healthcare                             | Nurse researchers                                       | Generation, integration and implementation of knowledge into practice based on concepts of communities of practice | Descriptive Explanatory Prescriptive     | ✓           | ✓             | ✓           | ✓            | ✓         | ✓              |            | ✓           | ✓            | ✓                 |                 | +<br>^   | ++<br>^^^  | +<br>^      |
| Knowledge           | Knowledge Use in Pain Care (KUPC)                                 | Latimer MA, Ritchie JA & Johnston CC. 2010[39] | Knowledge (pain care for children) | Nursing practice in hospitals          | Healthcare administrators clinical leaders, researchers | Link theory and evidence from clinical and administrative perspectives to implementation activities                | Descriptive                              |             |               |             |              | ✓         |                |            | ✓           | ✓            | ✓                 | ✓               | ++<br>^^ | ++<br>^^   | nil         |
| Knowledge           | Collaborative model of knowledge translation in clinical Settings | Baumbusch JL et al. 2008[40]                   | Research findings                  | Clinical settings                      |                                                         | Provide an interactive model of knowledge translation                                                              | Explanatory                              | ✓           | ✓             | ✓           | ✓            | ✓         | ✓              | ✓          |             |              | ✓                 | ✓               | ++<br>^  | +<br>^^    | +<br>^      |
| Knowledge           | Knowledge integration model                                       | Gauthier N et al. 2005[41]                     | Knowledge/ evidence                | Clinical settings                      | Researchers, clinicians and decision makers             | Illustrate the dynamic and reiterative nature of knowledge integration supported by on-going dialogue              | Descriptive                              | ✓           | ✓             | ✓           |              | ✓         |                | ✓          |             | ✓            |                   |                 | +<br>^   | ++<br>^^   | +<br>^      |

| Innovation category     | Framework                                                                         |                                 | Orientation                           |                                  |                                           |                                                                                                            | Type                                     | Stages      |               |             |              |           | Domains        |            |             | Elements     |                   |                 |          |            |             |
|-------------------------|-----------------------------------------------------------------------------------|---------------------------------|---------------------------------------|----------------------------------|-------------------------------------------|------------------------------------------------------------------------------------------------------------|------------------------------------------|-------------|---------------|-------------|--------------|-----------|----------------|------------|-------------|--------------|-------------------|-----------------|----------|------------|-------------|
|                         | Title                                                                             | Reference                       | Innovation                            | Setting                          | User(s)                                   | Aim                                                                                                        | Descriptive<br>Explanatory<br>Predictive | Development | Communication | Exploration | Installation | Operation | Sustainability | Innovation | Individuals | Organisation | Local environment | External system | Factors  | Strategies | Evaluations |
| Evidence based practice | Trinity model of evidence-based practice                                          | Vratny A & Shriver D. 2007[42]  | Evidence based practice model of care | Medical centre (hospital)        | Nursing administrators                    | Use a tree metaphor to depict the core components to overcome barriers and encourage EBP implementation    | Descriptive                              |             |               |             | ✓            | ✓         |                | ✓          | ✓           | ✓            | ✓                 | ✓               | ++<br>^^ | ++<br>^^^  | ++<br>^^    |
| Evidence based practice | Process for the use of evidence-based practice model for staff nurses             | Reavy K & Tavernier S. 2008[43] | Evidence based practice model         | Medical centre (hospital)        | Staff nurses                              | Staff nurses to recognize ownership of their practice and role in changing practice                        | Prescriptive                             | ✓           |               | ✓           | ✓            | ✓         | ✓              |            | ✓           |              |                   |                 | +<br>^   | ++<br>^^   | +<br>^^     |
| Evidence based practice | Tyler collaborative model for evidence-based practice                             | Olade RA. 2004[44]              | Evidence based practice               | Healthcare settings              | Nurses and other healthcare professionals | Guide collaborative efforts toward evidence-based nursing practice                                         | Prescriptive                             |             |               | ✓           | ✓            | ✓         | ✓              |            | ✓           | ✓            |                   |                 | ++<br>^  | ++<br>^^   | +<br>^^     |
| Evidence based practice | Steps in building an EBP Program                                                  | MacRobert M. 2008[45]           | Evidence based practice               | Case management practice setting | Case managers                             | Describe steps and strategies to move EBP into practice                                                    | Explanatory<br>Prescriptive              |             |               |             | ✓            | ✓         |                | ✓          | ✓           | ✓            |                   |                 | +<br>^   | ++<br>^^^  | ++<br>^     |
| Evidence based practice | Advancing Research and Clinical Practice Through Close Collaboration Model (ARCC) | Melnyk BM et al. 2010[46]       | Evidence based practice               | Hospitals and healthcare systems | EBP implementers                          | Guide system-wide implementation and sustainability of EBP to improve quality of care and patient outcomes | Predictive                               |             |               |             | ✓            | ✓         |                |            | ✓           | ✓            |                   |                 | +<br>^^  | ++<br>^^   | +<br>^^     |

| Innovation category     | Framework                                                                                 |                                    | Orientation                                                                            |                                      |                                                    |                                                                                                                       | Type                                     | Stages      |               |             |              |           |                | Domains    |             | Elements     |                   |                 |         |            |             |
|-------------------------|-------------------------------------------------------------------------------------------|------------------------------------|----------------------------------------------------------------------------------------|--------------------------------------|----------------------------------------------------|-----------------------------------------------------------------------------------------------------------------------|------------------------------------------|-------------|---------------|-------------|--------------|-----------|----------------|------------|-------------|--------------|-------------------|-----------------|---------|------------|-------------|
|                         | Title                                                                                     | Reference                          | Innovation                                                                             | Setting                              | User(s)                                            | Aim                                                                                                                   | Descriptive<br>Explanatory<br>Predictive | Development | Communication | Exploration | Installation | Operation | Sustainability | Innovation | Individuals | Organisation | Local environment | External system | Factors | Strategies | Evaluations |
| Implementation programs | Replicating Effective Programs Framework (REP)                                            | Kilbourne AM et al. 2007[47]       | Program for implementing clinical and health service interventions                     | Community-based organisations        | Researchers, intervention developers, stakeholders | Framework that can be applied to implement interventions                                                              | Descriptive Prescriptive                 | ✓           | ✓             | ✓           | ✓            | ✓         | ✓              | ✓          | ✓           | ✓            | ✓                 | ✓               | ++<br>^ | +++<br>^^^ | ++<br>^^    |
| Implementation programs | CHANGE model (customised, holistic, analytical, network-building, grassroots, evaluatory) | Vega MY. 2009[48]                  | Program for implementing packaged prevention interventions                             | Community-based organisations        | Practitioners and researchers                      | Approach to provide skills to implement and capacity to reorient to interventions                                     | Descriptive Prescriptive                 |             |               |             | ✓            | ✓         | ✓              | ✓          | ✓           | ✓            | ✓                 | ✓               | +<br>^^ | ++<br>^^^  | ++<br>^^    |
| Implementation programs | ARC organisational and community intervention model                                       | Glisson C & Schoenwald SK 2005[49] | Program for implementing social and mental health treatments and services for children | Isolated community practice settings | Practitioners and researchers                      | Address the 'fit' between the social context and service technology, address technical, social and strategic factors. | Descriptive Explanatory                  |             |               |             | ✓            | ✓         | ✓              | ✓          | ✓           | ✓            | ✓                 |                 | +<br>^^ | ++<br>^^^  | ++<br>^^    |

- + The framework itemizes a limited range of factors, strategies or evaluations with no explanation for their inclusion
- ++ The framework itemizes a range of factors, strategies or evaluations with some justification for their inclusion
- +++ The framework itemizes a comprehensive range of factors, strategies or evaluations based on a literature review or expert consensus
- ^ Factors, strategies or evaluations provided as a list without description
- ^^ Factors, strategies or evaluations provided with definitions
- ^^^ Factors, strategies or evaluations provided with explanations which include the relationships between or within the elements (factors, strategies and evaluations) or mechanisms for operationalization

EBP = Evidence based practice model of practice; EBPs – Evidence-based practices; TCU – Texas Christian University

## References

1. Scheirer MA, Dearing JW: **An agenda for research on the sustainability of public health programs.** *Am J Public Health* 2011, **101**:2059-2067.
2. Johnson K, Hays C, Center H, Daley C: **Building capacity and sustainable prevention innovations: a sustainability planning model.** *Eval Program Plann* 2004, **27**:135-149.
3. Schell S, Luke D, Schooley M, Elliott M, Herbers S, Mueller N, Bunger A: **Public health program capacity for sustainability: a new framework.** *Implement Sci* 2013, **8**:15.
4. Wandersman A, Duffy J, Flaspohler P, Noonan R, Lubell K, Stillman L, Blachman M, Dunville R, Saul J: **Bridging the gap between prevention research and practice: the interactive systems framework for dissemination and implementation.** *Am J Community Psychol* 2008, **41**:171-181.
5. Simpson DD, Flynn PM: **Moving innovations into treatment: a stage-based approach to program change.** *J Subst Abuse Treat* 2007, **33**:111-120.
6. Durlak JA, DuPre EP: **Implementation matters: a review of research on the influence of implementation on program outcomes and the factors affecting implementation.** *Am J Community Psychol* 2008, **41**:327-350.
7. Fixsen DL, Blase KA, Naoom SF, Wallace F: **Core implementation components.** *Res Soc Work Pract* 2009, **19**:531-540.
8. Racine DP: **Reliable effectiveness: a theory on sustaining and replicating worthwhile innovations.** *Adm Policy Ment Health* 2006, **33**:356-387.
9. Mendel P, Meredith LS, Schoenbaum M, Sherbourne CD, Wells KB: **Interventions in organizational and community context: a framework for building evidence on dissemination and implementation in health services research.** *Adm Policy Ment Health* 2008, **35**:21-37.
10. Aarons G, Hurlburt M, Horwitz S: **Advancing a conceptual model of evidence-based practice implementation in public service sectors.** *Adm Policy Ment Health* 2011, **38**:4-23.
11. Lehman WE, Simpson DD, Knight DK, Flynn PM: **Integration of treatment innovation planning and implementation: strategic process models and organizational challenges.** *Psychol Addict Behav* 2011, **25**:252.
12. Addiction Technology Transfer Center (ATTC) Network Technology Transfer Workgroup: **Research to practice in addiction treatment: key terms and a field-driven model of technology transfer.** *J Subst Abuse Treat* 2011, **41**:169-178.
13. Feldstein AC, Glasgow RE: **A practical, robust implementation and sustainability model (PRISM).** *Jt Comm J Qual Patient Saf* 2008, **34**:228-243.
14. Damschroder LJ, Aron DC, Keith RE, Kirsh SR, Alexander JA, Lowery JC: **Fostering implementation of health services research findings into practice: a consolidated framework for advancing implementation science.** *Implement Sci* 2009, **4**:50-50.
15. Greenhalgh T, Robert G, Macfarlane F, Bate P, Kyriakidou O: **Diffusion of innovations in service organizations: systematic review and recommendations.** *Milbank Q* 2004, **82**:581-629.
16. Bradley EH, Fund C: **Translating research into practice: speeding the adoption of innovative health care programs.** *Commonw Fund* 2004, **724**:1-12.
17. Helfrich CD, Weiner BJ, McKinney MM, Minasian L: **Determinants of implementation effectiveness.** *Med Care Res Rev* 2007, **64**:279-303.
18. May C, Finch T: **Implementing, embedding, and integrating practices: an outline of normalization process theory.** *Sociology* 2009, **43**:535-554.
19. May C: **Agency and implementation: understanding the embedding of healthcare innovations in practice.** *Soc Sci Med* 2013, **78**:26-33.
20. May C: **Towards a general theory of implementation.** *Implement Sci* 2013, **8**:18.

21. Ballard N: **Factors associated with success and breakdown of shared governance.** *J Nurs Adm* 2010, **40**:411-416.
22. Joseph V, West RM, Shickle D, Keen J, Clamp S: **Key challenges in the development and implementation of telehealth projects.** *J Telemed Telecare* 2011, **17**:71-77.
23. Carey M, Buchan H, Sanson-Fisher R: **The cycle of change: implementing best-evidence clinical practice.** *Int J Qual Health Care* 2009, **21**:37-43.
24. Berta W, Teare GF, Gilbert E, Ginsburg LS, Lemieux-Charles L, Davis D, Rappolt S: **The contingencies of organizational learning in long-term care: factors that affect innovation adoption.** *Health Care Manage Rev* 2005, **30**:282-292.
25. Hader JM, White R, Lewis S, Foreman JL, McDonald PW, Thompson LG: **Doctors' views of clinical practice guidelines: a qualitative exploration using innovation theory.** *J Eval Clin Pract* 2007, **13**:601-606.
26. Gagliardi AR, Brouwers MC, Palda VA, Lemieux-Charles L, Grimshaw JM: **How can we improve guideline use? A conceptual framework of implementability.** *Implement Sci* 2011, **6**:26.
27. Grol R, Wensing M: **What drives change? Barriers to and incentives for achieving evidence-based practice.** *Med J Aust* 2004, **180**:S57.
28. Pronovost PJ, Berenholtz SM, Needham DM: **Translating evidence into practice: a model for large scale knowledge translation.** *BMJ* 2008, **337**:963-965.
29. Kitson AL, Rycroft-Malone J, Harvey G, McCormack B, Seers K, Titchen A: **Evaluating the successful implementation of evidence into practice using the PARIHS framework: theoretical and practical challenges.** *Implement Sci* 2008, **3**:1-1.
30. Stetler CB, Damschroder LJ, Helfrich CD, Hagedorn HJ: **A Guide for applying a revised version of the PARIHS framework for implementation.** *Implement Sci* 2011, **6**:99-99.
31. Rycroft-Malone J, Seers K, Chandler J, Hawkes C, Crichton N, Allen C, Bullock I, Strunin L: **The role of evidence, context, and facilitation in an implementation trial: implications for the development of the PARIHS framework.** *Implement Sci* 2013, **8**:28.
32. Kontos PC, Poland BD: **Mapping new theoretical and methodological terrain for knowledge translation: contributions from critical realism and the arts.** *Implement Sci* 2009, **4**:1.
33. Best A, Hiatt RA, Norman CD: **Knowledge integration: conceptualizing communications in cancer control systems.** *Patient Educ Couns* 2008, **71**:319-327.
34. Graham ID, Logan J, Harrison MB, Straus SE, Tetroe J, Caswell W, Robinson N: **Lost in knowledge translation: Time for a map?** *J Contin Educ Health Prof* 2006, **26**:13-24.
35. Elwyn G, Taubert M, Kowalczyk J: **Sticky knowledge: a possible model for investigating implementation in healthcare contexts.** *Implement Sci* 2007, **2**:44.
36. Edgar L, Herbert R, Lambert S, MacDonald JA, Dubois S, Latimer M: **The joint venture model of knowledge utilization: a guide for change in nursing.** *Nurs Leadersh (Tor Ont)* 2006, **19**:41-55.
37. Landry R, Amara N, Pablos-Mendes A, Shademani R, Gold I: **The knowledge-value chain: a conceptual framework for knowledge translation in health.** *Bull World Health Organ* 2006, **84**:597-602.
38. Palmer D, Kramlich D: **An introduction to the multisystem model of knowledge integration and translation.** *ANS Adv Nurs Sci* 2011, **34**:29-38.

39. Latimer MA, Ritchie JA, Johnston CC: **Individual nurse and organizational context considerations for better knowledge use in pain care.** *J Pediatr Nurs* 2010, **25**:274-281.
40. Baumbusch JL, Kirkham SR, Khan KB, McDonald H, Semeniuk P, Tan E, Anderson JM: **Pursuing common agendas: a collaborative model for knowledge translation between research and practice in clinical settings.** *Res Nurs Health* 2008, **31**:130-140.
41. Gauthier N, Ellis K, Bol N, Stolee P: **Beyond knowledge transfer: a model of knowledge integration in a clinical setting.** *Healthc Manage Forum* 2005, **18**:33-37.
42. Vratny A, Shriver D: **A conceptual model for growing evidence-based practice.** *Nurs Adm Q* 2007, **31**:162-170.
43. Reavy K, Tavernier S: **Nurses reclaiming ownership of their practice: implementation of an evidence-based practice model and process.** *J Contin Educ Nur* 2008, **39**:166-172.
44. Olade RA: **Strategic collaborative model for evidence-based nursing practice.** *Worldviews Evid Based Nurs* 2004, **1**:60-68.
45. MacRobert M: **A leadership focus on evidence-based practice: tools for successful implementation.** *Prof Case Manag* 2008, **13**:97-101.
46. Melnyk BM, Fineout-Overholt E, Gallagher-Ford L, Stillwell SB: **Evidence-based practice, step by step: sustaining evidence-based practice through organizational policies and an innovative model.** *Am J Nurs* 2011, **111**:57-60.
47. Kilbourne AM, Neumann MS, Pincus HA, Bauer MS, Stall R: **Implementing evidence-based interventions in health care: application of the replicating effective programs framework.** *Implement Sci* 2007, **2**:42.
48. Vega MY: **The CHANGE approach to capacity-building assistance.** *AIDS Educ Prev* 2009, **21**:137-151.
49. Glisson C, Schoenwald SK: **The ARC organizational and community intervention strategy for implementing evidence-based children's mental health treatments.** *Ment Health Serv Res* 2005, **7**:243-259.
